# Supplementary material
Source: publisher figshare collection journal article supplement (https://acs.figshare.com/ndownloader/files/5470019)
Supplement: Supplementary file 1 [file 5470019]

## Sheet: internal Calibration Samples
	Calibration mix samples (internal standards for TMT accuracy correction)#
	Protein Name	UniProt AC	Mix 1*	Mix 2*	Mix 3*	Mix 4*	Mix 5*	Mix 6*
	Phosphorylase B	PYGM_RABIT P00489	20	5	4	1	0.8	0.2
	Conalbumin	TRFE_CHICK P02789	5	20	1	4	0.2	0.8
	Ovalbumin	OVAL_CHICK P01012	20	10	4	2	0.8	0.4
	beta-casein	CASB_BOVIN P02666	10	20	2	4	0.4	0.8
	beta-galactosidase B	GAL_ECOLI P00722	20	10	4	2	0.8	0.4
	alpha-lactalbumin	B6V3I5_BOVIN B6V3I5	10	20	2	4	0.4	0.8
		0.15 % formic acid	0	0	68	68	81.6	81.6
		Total Volume	85	85	85	85	85	85
	* Volume (in µl) used. Protein concentration of each digested protein sample was 2.5 pmol/µl, respectively.
	# 1 µl of calibration mix was spiked into the peptide samples, respectively, before TMT labeling

## Sheet: Accuracy and Precision samples
	2-Proteome-Accuracy peptide samples
	Protein digest	Control*	0.2-fold*	0.5-fold*	1.5-fold*	10-fold*	Control*
	B. henselae	2.5	0.5	1.25	3.75	25	2.5
	HeLa S3	40	40	40	40	40	40
	2-Proteome-Precision peptide samples
	Protein digest	Control*	1.5-fold*	2-fold*
	B. henselae	30	22.5	30
	HeLa S3	300	150	150
	Samples prepared for Label-free Quantification (LFQ)#
	Protein digest	Sample 1*	Sample 2*	Sample 3*	Sample 4*
	B. henselae	1	1.5	2	10
	HeLa S3	50	50	50	50
	* Volume (in µl) used. Protein concentration of each digested protein sample was 0.5 µg/µl, respectively.
	# 0.15% formic acid was added to all LFQ samples to reach a final volume of 100 µl.
